# Supplementary material for: Bridging the Digital Divide: Evaluating the Impact of Digital Literacy Training for School Students in Baltimore’s Underserved Communities
Source: Research Square preprint supplement (doi:10.21203/rs.3.rs-8536875/v1), 2026-02-18
Supplement: Supplementary file 1 [file a1244af49eac3cbb4561a8f2.xlsx]

## Sheet: Summary_of_Families___Navigator
Family	Navigator	Child/Grade	Sessions	Key Outcomes	Challenges
Hernandez (Alex Flores)	Benita Threadgill	Elementary (ESL, reading)	5 sessions	Improved bilingual reading; parent advocacy	Tech barriers (broken computer), health (ear infections)
Newsome (Mason & Maria N.)	Benita Threadgill	Mason 10 (reading issues), Maria 14 (transition HS)	Multiple	Mason: literacy growth, creativity; Maria: self-advocacy	Grief, vision issues, emotional stress
Pressley (Trinity)	Benita Threadgill	7 years, 2nd grade	6 sessions	Improved reading, math, cultural awareness	Needed more support for older sibling
Green (Traci & Delaney)	Surakshya Paudel	Delaney, 6 years, kindergarten	8 sessions	Early math skills, Google search basics, parental engagement	Attention span, tech tool selection
Forleh (Anthony & Zoriyah)	Abhinav Poudel	Anthony (math), Zoriyah (reading)	4+ sessions	Fact vs. fiction online, ChatGPT itinerary, improved digital search	Zoom disruptions, variable progress
Davidson Family	Ataeviya Dilworth	Not specified	Ongoing	Some digital engagement	Limited details
Hunt Family	Ataeviya Dilworth	Not specified	0	None	Scheduling conflicts, opted out
Powell Family	Ataeviya Dilworth	2 daughters, 11 & 12 (math challenges)	0	None	No contact after intake
Walker Family (Kallea)	Vandana Pandey	7th grade	4 sessions	Digital footprint awareness, privacy skills	None noted
Miller Family (Jaya)	Vandana Pandey	Elementary	2 sessions	Math/reading games, positive engagement	None
Webb Family	Vandana Pandey	Not specified	0	None	No contact
Mighol Family	Claudette Tebeck	Not specified	Unknown	Minimal notes	Unclear
Wells Family	Claudette Tebeck	Not specified	0	None	No response
Monique Ragin Family	Claudette Tebeck	Not specified	Unknown	Limited notes	Unclear
Blackwell Family	Victory Momoh	Not specified	0	None	No engagement, opted out
Jennings Family (Katilina 'Keke')	Victory Momoh	3rd grade	2 sessions	Basic literacy intro, engagement limited	Possible ADHD, short attention span, caregiver burden
Jennie Family	Kiran Tiwari	4th grade girl	8 sessions	Math (fractions), Google search, ChatGPT	Fatigue, scheduling conflicts
Sanethis Anderson Family	Kiran Tiwari	Donvale (8th), Keishawn (7th)	2 sessions	Typing practice, science activity	Minimal participation
Manuel Family	Kiran Tiwari	Child (math focus)	6 sessions	Fractions, Khan Academy, ChatGPT use	None significant
Moore Family (Cortez)	Sujata Sharma	14 years, 8th grade, disability	8 sessions	Typing, Khan Academy, MS Word/PowerPoint	Intellectual disability, homeschooling context
Murphy Family	Sujata Sharma	Not specified	0	None	No response
Gardner Family (Kamyia)	Sujata Sharma	9th grade	1 session	Expressed nursing interest, digital use	No-shows
Austin Family	Rhythm Thapa	Not specified	0	None	No response
Delores Lindo Family	Rhythm Thapa	Daughter, 9 (ADHD)	3 sessions	Introduced apps, partial progress	Behavioral issues, attention
Dionna Green Family	Rhythm Thapa	Not specified	0	None	Family issues, laptop return
Autumn Gregory Family	Ricky Gole	Not specified	0	None	No response
Irving Family (Jalisa)	Smriti Garbuja	4th grade	6 sessions	Math & reading apps (Moose Math, Duolingo)	Division struggles, but improved
Davidson Family	Tashana Davidson	Not specified	Unknown	Case note placeholder	Unclear
